1

---

# Hierarchy-guided Neural Networks for Species

## Classification

Mohannad Elhamod,<sup>1,\*</sup> Kelly M. Diamond,<sup>2</sup> A. Murat Maga,<sup>2,3</sup> Yasin Bakis,<sup>4</sup>  
Henry L. Bart Jr.,<sup>4</sup> Paula Mabee,<sup>5</sup> Wasila Dahdul,<sup>6</sup> Jeremy Leipzig,<sup>7</sup>  
Jane Greenberg,<sup>7</sup> Brian Avants<sup>8</sup> and Anuj Karpatne<sup>1</sup>

<sup>1</sup>Virginia Tech, Blacksburg, 24060, VA, USA, <sup>2</sup>Seattle Children's Research Institute, Seattle, 98199, WA, USA, <sup>3</sup>University of Washington, Seattle, 98115, WA, USA, <sup>4</sup>Tulane University, New Orleans, 70118, LA, USA, <sup>5</sup>National Ecological Observatory Network, Battelle, Boulder, 80304, CO, USA, <sup>6</sup>University of California, Irvine, Irvine, 92623, CA, USA, <sup>7</sup>Metadata Research Center, Drexel University, Philadelphia, 1910, PA, USA and <sup>8</sup>University of Virginia, Charlottesville, 22904, VA, USA

\*Corresponding author. [elhamod@vt.edu](mailto:elhamod@vt.edu)

2

---

### 3 Abstract

- 4 1. Species classification is an important task that is the foundation of industrial, commercial, ecological, and scientific applications  
5 involving the study of species distributions, dynamics, and evolution.
- 6 2. While conventional approaches for this task use off-the-shelf machine learning (ML) methods such as existing Convolutional  
7 Neural Network (ConvNet) architectures, there is an opportunity to inform the ConvNet architecture using our knowledge of  
8 biological hierarchies among taxonomic classes.
- 9 3. In this work, we propose a new approach for species classification termed Hierarchy-Guided Neural Network (**HGNN**), which  
10 infuses hierarchical taxonomic information into the neural network's training to guide the structure and relationships among  
11 the extracted features. We perform extensive experiments on an illustrative use-case of classifying fish species to demonstrate  
12 that **HGNN** outperforms conventional ConvNet models in terms of classification accuracy, especially under scarce training data  
13 conditions.
- 14 4. We also observe that **HGNN** shows better resilience to adversarial occlusions, when some of the most informative patch regions  
15 of the image are intentionally blocked and their effect on classification accuracy is studied.

## 16 Introduction

17 Depicting the branching pattern of taxa, phylogeny represents a hypothesis of evolutionary relationships based on shared similarities  
18 derived from common ancestry (Hennig, 1966). From conservation to zoology, phylogenetic relationships are critical for interpreting  
19 study results and implications in the biological sciences. One area, however, where this hierarchical information has yet to be  
20 fully incorporated is that of machine learning and image classification. Deep neural networks have found immense success in image  
21 classification problems with state-of-the-art ConvNet models (e.g., GoogleNet (Szegedy et al., 2015), AlexNet (Krizhevsky et al.,  
22 2012), and VGGNet (Simonyan and Zisserman, 2014)) reaching unprecedented performance on large-scale benchmark datasets such  
23 as ImageNet (Deng et al., 2009) and CIFAR (Krizhevsky, 2009). By design, deep neural networks function similarly to phylogenetic  
24 analyses by extracting a hierarchy of simpler to more complex forms of abstraction in hidden layers—simpler features at lower  
25 depths (e.g., edges and texture) are non-linearly composed to form complex features at higher depths (e.g., eyes and fins). This has  
26 motivated several recent architectural innovations in deep learning such as ResNet (He et al., 2016), ResNeXt (Xie et al., 2017),  
27 and DenseNet (Huang et al., 2017), that have enabled the learning of deep and complex hierarchy of hidden features. However, the  
28 innate hierarchy extracted by neural networks from data is not necessarily tied to known evolutionary relationships in real-world  
29 applications. In this work, we explore the question: *Is it possible to make use of known phylogenetic classes to inform the learning*  
30 *of features, and can it lead to better generalization and robustness?*

31 Image classification in real-world biological problems such as species classification is fraught with several challenges that limit  
32 the usefulness of state-of-the-art deep learning methods trained on benchmark datasets. First, real-world images of specimens suffer  
33 from various data quality issues such as damaged specimens and occlusions of key morphological features (Fox and Hartman, 2019),  
34 which can crucially impact classification performance. Figure 1 shows some relevant examples. Second, real-world datasets for  
35 classification are limited in their scale in comparison to benchmark datasets, with limited representative power in terms of number  
36 of species (Rathi et al., 2018; Ogunlana et al., 2015; Costa et al., 2013; Larsen et al., 2009; Lee et al., 2008; Allken et al., 2019; Rauf  
37 et al., 2019; Ding et al., 2017), or number of images per species (Rodrigues et al., 2010; Lee et al., 2003). This is especially true for  
38 rare species (Villon et al., 2021). Third, the hierarchy of features extracted by conventional deep learning frameworks, while useful  
39 for prediction, do not conform to known biological hierarchies and hence do not directly translate to advancing scientific knowledge,  
40 which is often a more important goal than improving predictive performance for a scientist (Karpatne et al., 2017). While these  
41 challenges are applicable to species classification problems involving a variety of taxa, in this study we focus on the problem of  
42 classifying the species of a fish specimen given a 2D image. We selected fishes for our study because they are a highly diverse,  
43 well-studied, and an ancient group of animals that comprise almost half of all vertebrate species (Helfman et al., 2009). Further, the  
44 phylogenetic relationships of fishes are well-studied (Betancur-R et al., 2017; Hughes et al., 2018), and the taxonomic classification  
45 of fishes is generally aligned with phylogeny.

46 Early work on automated fish classification used basic computer vision and image processing techniques to extract shape features  
47 such as landmarks and measurements and used tools such as decision trees, discriminant function analysis, and support vector  
48 machines to classify species based on these features (Lee et al., 2003, 2008; Larsen et al., 2009; Ogunlana et al., 2015). Others have  
49 applied scale-invariant feature transform (SIFT) and principal component analysis (PCA), and then used nearest neighbor search  
50 for classification (Rodrigues et al., 2010). Only recently has the use of raw image features in its intrinsic high-dimensionality become

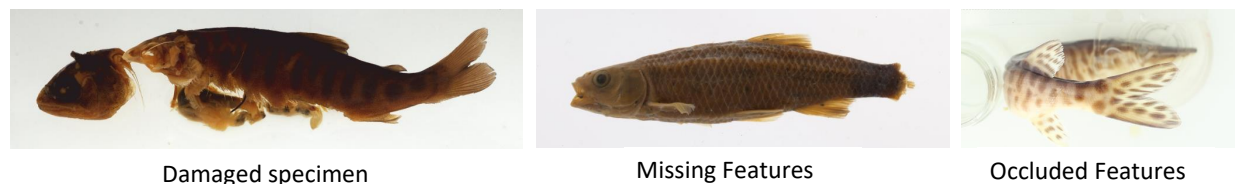

Fig. 1: Fish images from museum collections, demonstrating the challenges of curating fish image datasets.

51 more feasible, likely because of advances in computational capabilities. For example, (Hasija et al., 2017) employed graph-embedding  
52 discriminant analysis, which reduces the image set matching problem to a point-to-point classification problem.

53 Advances in computing power have also enabled researchers to use more flexible and powerful classification methods such as  
54 ConvNets, especially designed to work with high-dimensional images. The basic idea of a ConvNet is to learn convolutional kernels  
55 (or filters) of a fixed size at every layer, that are applied to the input image to generate multiple channels of image outputs for the  
56 next layer, followed by a final block of a max-pooling layer and a softmaxed fully connected layer to return class labels (Goodfellow  
57 et al., 2016). The number of feature maps is referred to as the width of the ConvNet, while the number of layers is termed as its  
58 depth. To further boost ConvNet's performance, image preprocessing techniques can be used. For example, (Rathi et al., 2018)  
59 pre-processed the fish images by means of Gaussian blurring, erosion and dilation and Otsu thresholding (Otsu, 1979).

60 More recently, researchers have taken advantage of state-of-the-art architectures available in the field of deep learning for biological  
61 classification. For example, in a work by (Rauf et al., 2019), the technique of *transfer learning* was explored for fish classification,  
62 where neural network models *pre-trained* over large and diverse benchmark datasets were used as building blocks and then *fine-*  
63 *tuned* on the fish images. Transfer learning eliminates much of the arduous task of hyper-parameter tuning otherwise required in the  
64 field of deep learning, and allows researchers to build on top of well-tested benchmark neural network models. It also saves model  
65 development time and boosts classification performance, especially when the available task-specific training sets are small (Yosinski  
66 et al., 2014). This technique has already been successfully applied in other prior works on fish classification (Siddiqui et al., 2018;  
67 Allken et al., 2019) and fish detection (Salman et al., 2019).

68 Extensions of ConvNets have also been used for several tasks such as fish detection, counting, and classification. For example,  
69 (Salman et al., 2019) have used R-CNNs (Girshick et al., 2014) along with background subtraction and optical flow features to detect  
70 fish in underwater videos. Similarly, (Jalal et al., 2020) attack the problems of fish detection and classification using a YOLO deep  
71 neural network (Redmon et al., 2016) combined with a mixture of Gaussians model and optical flow features. In a different approach,  
72 (Villon et al., 2020) post-process the prediction of a deep learning model with confidence thresholding to obtain a misclassification  
73 risk estimation, which is particularly useful for identifying rare species. Finally, (Villon et al., 2021) have proposed using few-  
74 shot learning (Wang et al., 2020) to achieve better results on rare species. This, however, is at the expense of less robustness at  
75 distinguishing species that look too similar.

76 Our current method aims for a generic method that incorporates hierarchy to improve neural network models. Here we use  
77 taxonomic relationships from fish classification to serve as an example training dataset. Specifically, we present a novel deep learning

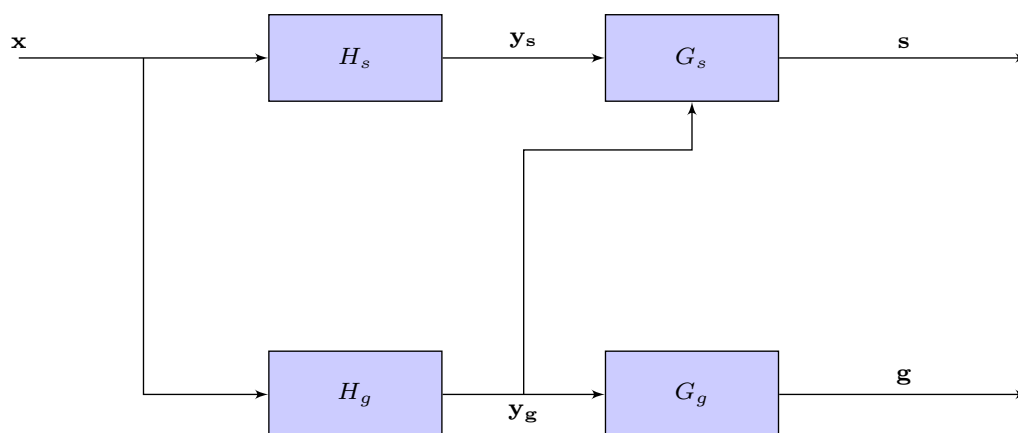

Fig. 2: Schematic diagram of **HGNN**. The top ResNet predicts the species ( $s$ ) of the input fish image ( $x$ ), while the bottom ResNet predicts the genus ( $g$ ). To leverage the relationship between genus and species classes for guiding the hidden features of our neural network, we harness the genus features learned at an intermediate depth ( $y_g$ ) of the genus ResNet and aggregate them with the species features learned at the  $y_s$  level of the species ResNet. The combination of both species and genus features are then used to make species class predictions. This architecture is described in details in the Materials and Methods section.

78 architecture termed Hierarchy-Guided Neural Network (**HGNN**) that incorporates known hierarchy among classes (available as a  
79 two-level taxonomy: genus and species) to guide the learning of features at the hidden layers of the neural network. This work builds  
80 on a history of multi-label and hierarchical classification techniques using pre-built taxonomies (Silla and Freitas, 2011; Zhang and  
81 Zhou, 2013). Our proposed architecture shown in Figure 2 consists of two sub-modules (top and bottom rows) of ResNet models  
82 operating in parallel. We use the ResNet architecture in our work because it is currently among the most widely-used and best-  
83 performing ConvNet models for benchmark computer vision problems, including fish identification (Khan et al., 2020; Jalal et al.,  
84 2020; Villon et al., 2020; Ditria et al., 2020a), although our proposed idea of **HGNN** is generic and can work with any deep learning  
85 architecture. In Figure 2, the top row ResNet predicts the species class  $s$  of the input fish image  $x$ , while the bottom row predicts  
86 the genus class  $g$ . These ResNets learn a hierarchy of features (from simple to complex) at their hidden layers useful for the tasks  
87 of species and genus classification, respectively. While both these sub-modules can be viewed as learning separate features, we know  
88 that the genus features learned in the bottom ResNet represents features at a higher level of abstraction that are directly useful for  
89 the task of species classification. Building upon this knowledge in our proposed **HGNN** framework, we harness the genus features  
90 learned at an intermediate depth  $H_g$  of the genus sub-module, and aggregate them with the species features learned at the  $H_s$  depth  
91 of the species sub-modules. The combination of both species and genus features is then used for the task of species prediction.

92 While using taxonomic information for automated fish classification is not novel (Kutlu et al., 2017), to our knowledge, the  
93 only body of work that has researched it before in the context of deep learning is by (dos Santos and Gonçalves, 2019). However,  
94 our proposed method is distinguished in two ways. First, while they have used the family and order information, we use the genus  
95 information. We argue that incorporating the genus yields more information gain as it involves more discriminative features than the  
96 order and family. Second, their model only uses the taxonomic information in the last fully-connected layer, while our philosophy  
97 is to use it at a convolutional level of the network as that allows for capturing localized visual features that are taxonomically  
98 plausible.

99 We demonstrate the effectiveness of our proposed **HGNN** model in learning meaningful, diverse, and robust features at the  
100 hidden layers of the neural network leading to better generalization performance in the target application of fish species classification,

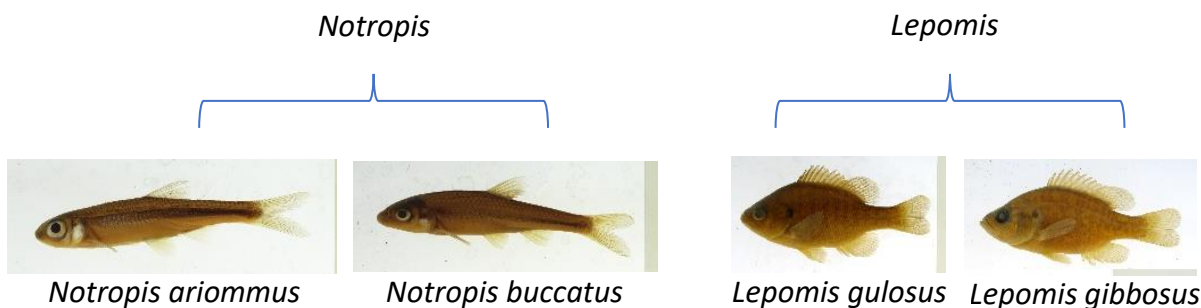

Fig. 3: Species that belong to the same genus exhibit features that are similar because of common ancestry.

101 even in the paucity of training data. We also empirically test the robustness of our model to synthetically generated image occlusions,  
102 where salient regions of the input images were intentionally occluded to adversely affect classification performance. We observe that  
103 by anchoring our learned features to the biologically known hierarchy among genus and species classes, our model is much more  
104 robust to occlusions as compared to a data-only ‘black-box’ model that only uses image data and predicts the species with no genus  
105 information (i.e. using only the top ResNet in Figure 2).

## 106 **Materials and Methods**

### 107 **HGNN framework**

108 We first present our proposed **HGNN** architecture that incorporates hierarchy among genus and species classes in neural network  
109 construction. We consider the problem of predicting the target species  $\mathbf{s}$  given input image  $\mathbf{x}$  using a composition of neural network  
110 layers. We are also given the genus level class  $\mathbf{g}$  for every input  $\mathbf{x}$ .

111 We make two observations to motivate our proposed **HGNN** framework. First, we assume that the hierarchical taxonomy of  
112 genus and species classes captures a notion of derived similarity in terms of the discriminatory input features of every class. This is  
113 true, as illustrated in Figure 3, in the context of fish classification because species classes that belong to the same genus are more  
114 closely related phylogenetically than species classified in different genera. In the case of the species and genera analyzed here, with  
115 only a few exceptions, this is the case (Supporting Information, Table S1). As a result, species that map to the same genus  $\mathbf{g}$  should  
116 generally share similar features at the internal representation of the neural network (e.g., filters learned at the convolutional layers).  
117 This observations seems to align with some earlier work (dos Santos and Gonçalves, 2019). Second, while the mapping from  $\mathbf{s}$  to  
118  $\mathbf{g}$  is one-to-one, the inverse mapping from  $\mathbf{g}$  to  $\mathbf{s}$  is not unique. Hence, along with the shared features learned for every  $\mathbf{g}$ , we also  
119 need to learn unique features for every  $\mathbf{s}$  to differentiate between species belonging to the same genus.

120 Building upon these two observations, we consider the following architectural composition of our neural network as shown in  
121 Figure 2. First, we use a functional block of layers  $H_g$  to extract hidden features at some intermediate depth of the neural network  
122 that are useful for predicting  $\mathbf{g}$  as well as  $\mathbf{s}$ . These hidden features are passed to another functional block  $G_g$  that predicts  $\mathbf{g}$ . The  
123 complete chain of function compositions from  $\mathbf{x}$  to  $\mathbf{g}$  can be represented as  $F_g(\mathbf{x})$ , where  $F_g = G_g \circ H_g$  and  $\circ$  represents the function  
124 composition operator. Second, we learn another functional block  $H_s$  that extracts hidden features unique to every species. Finally,

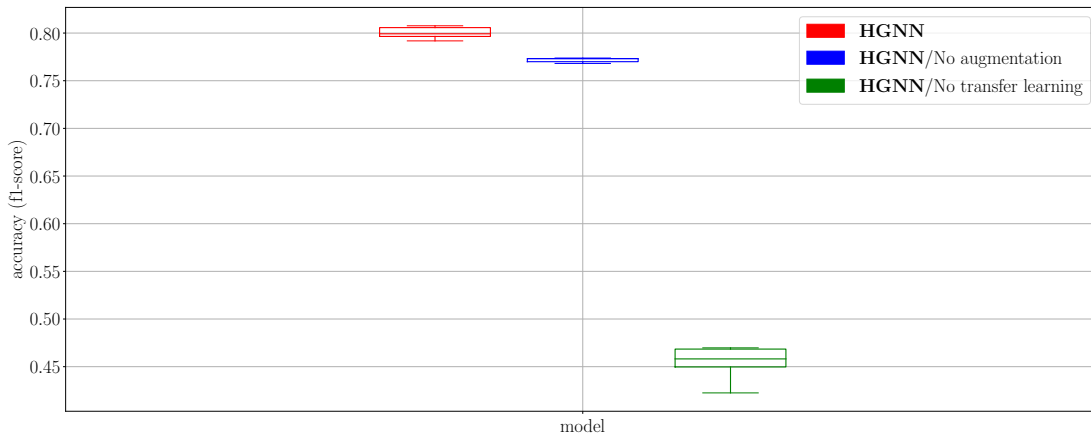

Fig. 4: Comparison among different models, showing the impact of data augmentation and transfer learning on the classification performance of **HGNN** models.

125 the features from  $H_s$  and  $H_g$  are combined using matrix addition and fed to another functional block of layers,  $G_s$  that predicts  
 126 the target species  $s$ . The composition of functions mapping  $\mathbf{x}$  to  $s$  can thus be given by  $f(\mathbf{x})$ , where  $F = G_s \circ (H_g + H_s)$ .

127 To train the functional blocks in the complete **HGNN** architecture, we consider minimizing the following objective function:

$$\min_{H_s, H_g, G_s, G_g} \lambda_s L_s(\mathbf{s}, t_s) + \lambda_g L_g(\mathbf{g}, t_g) \quad (1)$$

128 where  $L_s$  and  $L_g$  are loss (or error) functions defined on the space of species labels and genus labels, respectively, on the training set.  
 129 Specifically, these loss functions act as a measure of difference between the correct classification ( $t_s$  and  $t_g$ ), and the prediction ( $\mathbf{s}$   
 130 and  $\mathbf{g}$ ) on the training samples, respectively. We used the cross-entropy function as our preferred choice of loss function. Further,  $\lambda_s$   
 131 and  $\lambda_g$  are trade-off hyper-parameters balancing the relative importance of  $L_s$  and  $L_g$ , respectively; their values are automatically  
 132 assigned using the adaptive smoothing algorithm proposed in (Murugesan et al., 2016). Both the softmaxed outputs of our neural  
 133 network model,  $\mathbf{s}$  and  $\mathbf{g}$ , are probability vectors whose entries range from 0 to 1 proportional to the model's credence about each  
 134 species and genus class, respectively.

135 As mentioned in the Introduction, our model is composed of two identical ResNets. The first ResNet comprises of  $H_g$  and  $G_g$ ,  
 136 while  $H_s$  and  $G_s$  constitute the other. In our experiments, we found that the best point to extract the intermediate genus features  
 137 (i.e. the point between  $H_g$  and  $G_g$ ) is right before the final max-pooling layer. The same point in the other ResNet is used to  
 138 combine the genus and species features. Instead of initializing our neural network parameters (or weights) with arbitrary values, we  
 139 used pre-trained weights of ResNet trained on the ImageNet benchmark dataset as a good starting solution for our target problem  
 140 of fish classification. Then, by optimizing the loss function in equation (1) on the fish training dataset of interest, we fine-tuned the  
 141 parameters of the entire network to be more specialized for our target task. This technique, which is called transfer learning (Tan  
 142 et al., 2018a), is widely adopted in the field of deep learning particularly in applications of computer vision, and has proven its  
 143 effectiveness in scenarios with data paucity. In our preliminary experiments, as shown in Figure 4, we have found using this mode  
 144 of transfer learning to increase the model's average performance by about 35%.

---

## 145 Evaluation

### 146 Data Collection and Pre-processing

147 Our dataset comprises of images contributed by five museums that participated in the Great Lakes Invasives Network Project (GLIN).  
148 More information about this project can be found in the Data Availability section. This dataset, as is typical for biological species  
149 images, is highly imbalanced; some species have only a few images, while others have thousands. To alleviate this problem, and  
150 for computational feasibility, we created a number of subsets of the dataset for the purpose of training and evaluation. Specifically,  
151 we created two subsets that differ in terms of classification complexity (or difficulty). The first subset is called **Easy** and comes  
152 from a single museum (Illinois Natural History Survey). Therefore, its images are homogeneous in terms of lighting and camera  
153 conditions. The second is called **Hard** and its images are aggregated from across all museums, making it a larger, more diverse, and  
154 more complex dataset. Comparing results from these two datasets helps illustrate the effects of dataset complexity on classification  
155 performance. We further created two subsets of the **Easy** dataset by capping the number of images per species in the **Easy** dataset  
156 to 50 or 100. These different dataset sizes help illustrate how training data paucity impacts the model's classification performance.  
157 Henceforth, the suffix of the dataset will refer to the number of images per species. For example, **Easy/100** has 100 images per  
158 species. Table 1 gives a statistical summary of each dataset considered in this study. More details can be found in the Supporting  
159 Information document, Tables S2, S3, and S4

160 The acquired fish images typically contained a ruler, specimen label(s), and species tags along with the fish specimen. To retain  
161 only the fish region in the images, we trained a 2D Unet model (Goodfellow et al., 2016) using a small portion of our data in the  
162 ANTsRNet software (Tustison et al., 2018). We manually segmented the background, fish, scale bar, and field notes on 550 images  
163 using 3D Slicer (Kikinis et al., 2014). We used weights from the trained model to automatically mask and crop the fish specimen  
164 portion of the remainder images. With the exception of rare cases where the fish overlapped the scale bar and/or the field notes,  
165 which were discarded, this pipeline resulted in successful generation of RGB fish-only images at the original resolution. The pipeline  
166 was implemented in R using ANTsR (Avants, 2019) and ANTsRNet.

167 Once the cropped fish images were obtained, we performed data augmentation by randomly applying standard image  
168 transformations used in deep learning for computer vision, including translations of up to 0.25 of the image dimension, flips  
169 with a probability of 30%, rotations of up to 60°, and Gaussian random intensity variations using PCA with  $\sigma = 0.1$  of the color  
170 channel value (Krizhevsky et al., 2012). Data augmentation is critical when using ConvNets for image processing and is a common  
171 practice for fish classification (Villon et al., 2020, 2021), especially when the available data is limited (Shorten and Khoshgoftaar,  
172 2019). By training the model on variations of the same image, the model is deterred from learning nuanced patterns in the images  
173 that can lead to spurious performance, such as the intensity of the background, and encouraged to be robust under variable input  
174 conditions. Our preliminary results, as shown in Figure 4, indicate that data augmentation boosted the model's accuracy by about  
175 2.8%.

### 176 Evaluation Setup for Comparing Classification Performance

177 In the process of training black-box neural network architectures, it is common to observe higher generalization errors when the  
178 amount of training data is small. However, in **HGNN**, we show that by including a biological knowledge-guided loss term (see  
179 Equation 1) in the learning objective of neural networks, we can achieve reasonably good generalization performance even in  
180 situations where training data are scarce. This is in alignment with the observations made in a previous work by (Jia et al., 2019).

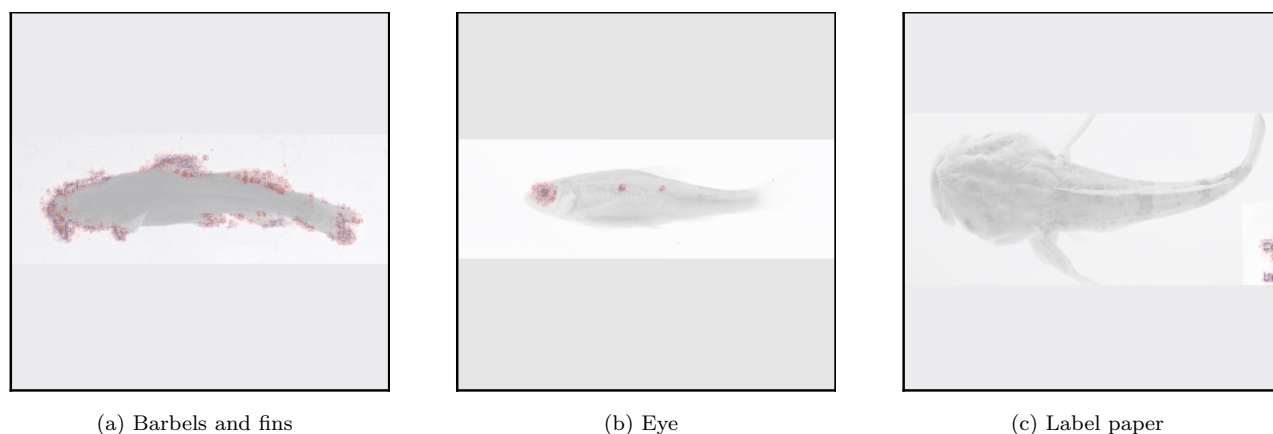

Fig. 5: Saliency maps of different fish images obtained for **Blackbox-NN**. Pixels in red denote image regions with high saliency scores, indicating higher importance of those regions for fish classification as perceived by the model.

181 To test for this hypothesis in the context of fish classification, we compared the classification performance of our proposed model  
182 to a baseline black-box neural network architecture (termed **Blackbox-NN**) comprising of a ResNet of the same size and shape  
183 as that of one of the ResNets of our proposed model. Specifically, we compared the performance of **HGNN** and **Blackbox-NN**  
184 on each of the three data subsets mentioned in Table 1. For each of these subsets, we used 64% of the data for training, 16% for  
185 validation, and the remainder for testing. To measure classification performance, we used the f1-score of the correct species class  
186 (Tan et al., 2018b). Throughout this paper, we used box plots to show the model’s performance over five random runs of neural  
187 network training. To obtain the best-performing neural network models, we performed an explorative Naïve-Bayes approach for  
188 hyper-parameter search and fine-tuning. Then, we picked those parameters that performed best on the validation set.

### 189 Tools for Deep Learning Visualization and Assessing Robustness to Adversarial Occlusions

190 Saliency maps (Simonyan et al., 2014) are heatmaps of the gradients of a neural network model’s output with respect to its input.  
191 In other words, a saliency map shows how strongly do changes in pixel values of a certain region of the image cause a change in the  
192 species’ probability, highlighting the areas of the image that are most decisive for the classification problem. While other tools, such  
193 as GradCAM (Selvaraju et al., 2017), have been used for the same purpose (dos Santos and Gonçalves, 2019), we found saliency  
194 maps to be more powerful and capable of detecting the most subtle visual features. Figure 5 shows some examples of saliency maps  
195 obtained for **Blackbox-NN**. The code we used for generating these saliency maps is inspired by FlashTorch (Ogura and Jain, 2020),  
196 an implementation tool based on Guided Back-propagation (Springenberg et al., 2015). As we can see in Figure 5, the baseline  
197 model is quite sensitive to different features of the input fish image for different species, including barbels and fins in Figure 5a  
198 and the eye in Figure 5b. Saliency maps are also a good debugging tool as they can reveal cases where the model is “cheating” or  
199 looking at irrelevant features of the image that are not biologically meaningful for the purpose of fish classification. An example of  
200 such a case is presented in Figure 5c, where the model is incorrectly picking up pixels around the note on the label paper in the  
201 image as regions with high saliency scores. In this way, saliency maps can be used for “interpreting” the learned features of neural  
202 network models.

203 Along with offering interpretability, saliency maps can also be used for investigating the resiliency (or robustness) of neural  
204 networks to adversarial occlusions. For example, by occluding regions (or patches) in the input image with high saliency scores, a



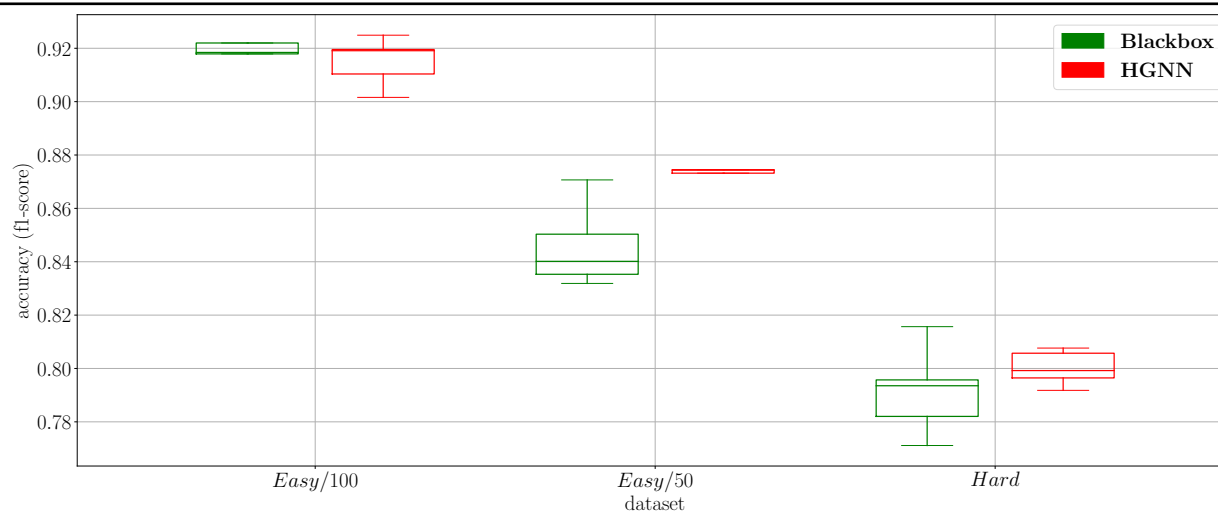

Fig. 6: Classification performance across different subsets of the GLIN dataset for **HGNN** and **Blackbox-NN**. By definition, as the boxes for the two models do not overlap for **Easy/50** and **Hard**, it means there is at least 95% confidence (McGill et al., 1978) that the median accuracy of **HGNN** is higher than **Blackbox-NN**

205 neural network model's reliability at making correct predictions can be stress-tested even when it is starved off information from  
206 salient image regions. To measure the robustness of a model at every round of adversarial occlusions, we calculated the average  
207 probability of the correct class predicted by the model on an input image  $\mathbf{x}$ , averaged over all test images as  $\mathbb{E}_{\mathbf{x}}(P_{t_s}(\mathbf{x}))$ . The  
208 higher this metric, the less confused the model is about the input. Further, by measuring drops in this metric as a consequence of  
209 adversarial occlusions, we can evaluate if a model is too sensitive to selective regions of the input image (with the highest saliency  
210 score contributions), which when obstructed can confuse a model into making incorrect predictions. We make use of this metric to  
211 assess the robustness of **Blackbox-NN** and **HGNN** in our experiments.

## 212 Results

### 213 Effect of Dataset Complexity and Training Size

214 Figure 6 shows a comparison between **HGNN** and **Blackbox-NN** on three subsets of the GLIN dataset: **Easy/100**, **Easy/50**, and  
215 **Hard**. Two observations can be made from this figure. First, as datasets become more complex (e.g., the **Hard** dataset) and/or  
216 subject to less training data (e.g., the **Easy/50**), the performance of the model deteriorates. Second, and more importantly, the  
217 impact of our method is more pronounced exactly when data is scarce and the dataset is complex. As Figure 6 shows, while the  
218 median performance of **HGNN** is almost equal to that of **Blackbox-NN** for **Easy/100**, which is the easiest of the datasets, the  
219 former clearly outperforms the latter on both **Easy/50** and **Hard**. This highlights our model's power and ability to compensate for  
220 the relative lack of data with respect to dataset complexity by incorporating biological knowledge.

### 221 Effect of Adversarial Occlusion

222 To demonstrate **HGNN**'s resiliency to adversarial occlusions, we iteratively cover regions (or patches) in an image with the highest  
223 saliency scores and report the probability of the correct class predicted by the model over the occluded image. Figure 7 shows an  
224 example of this process on an illustrative fish specimen from the **Easy/50** dataset. From left to right, the figure shows a progression

225 from an image with no occlusion towards applying more patches of adversarial occlusions (seen as green square patches) on the  
226 same image. Below each image is the model's predicted probabilities over the 5 most probable species sorted in descending order,  
227 for both **HGNN** (top row) and **Blackbox-NN** (bottom row). We make a number of observations here. First, all of the saliency  
228 maps highlight the features of importance for classifying this fish, namely the eye, nostrils, and the dorsal fin. However, notice  
229 that the saliency maps for **HGNN** are slightly different from that of **Blackbox-NN**, demonstrating that the two models are not  
230 looking at the image in the exact same way (i.e., they have distinct saliency maps). This difference is important for making a fair  
231 comparison between the two models. Second, even when there is no occlusion, while **Blackbox-NN** makes the correct prediction, its  
232 probability of the correct species class is significantly lower than that of **HGNN**'s. This demonstrates **HGNN**'s ability to extract  
233 more useful and generalizable features from images for fish classification. Third, after applying two patches of occlusions (in the  
234 middle column), we notice that even though both models get the species right, **Blackbox-NN**'s second guess is not within the  
235 correct genus. Finally, and most importantly, after applying four patches of occlusions (in rightmost column), we notice that while  
236 both models start predicting the wrong class, **HGNN** is still within the correct genus, while **Blackbox-NN** is not. It follows that  
237 the **Blackbox-NN** model is not learning phylogenetic features that could be used in other tasks, such as trait segmentation. To  
238 drive this point home, we automate this process for the entire dataset and compute the average predicted probability of the correct  
239 class across all images, as a function of the number of adversarial occlusions applied to the images. Table 2 reports the results for  
240 each number of patches ranging from 0 (no occlusion) to 4. We can see that **HGNN** shows higher average probability of the correct  
241 class across all number of patches in comparison with **Blackbox-NN**. This demonstrates **HGNN**'s ability to generalize and handle  
242 image imperfections better, especially when the most informative (or salient) regions of the image are occluded.

## 243 **Discussion**

244 In this paper, we have shown that embedding the hierarchical taxonomy of the genus and species classes in the design and learning of  
245 neural networks leads to solutions with better generalization, superior accuracy, and better resiliency to adversarial occlusions. Most  
246 of the deep learning methods currently in the literature perform tasks without learning biologically-relevant features. Our proposed  
247 method leverages a particularly important aspect of species classification—the hierarchical arrangement of taxon names—which  
248 improves model interpretability and biological-validity. The aim of our method is to provide biologists not only with the correct  
249 classification, but also with a plausible one when it fails.

250 An ultimate goal of this research is to augment biological information on the connections among phenotype, genotype and  
251 environment into deep learning, so that an understanding of genealogical relationships among species is discovered by our neural  
252 networks. While we have not fully investigated these relationships here, a future direction of our project is to explore how the  
253 anatomical features of species learned by our models relate to the environments the species were collected from and how closely  
254 related the species are. This would increase understanding of how the environment and genealogy shape the phenotypes of species.  
255 Moreover, we plan to investigate how such learned features aid us in other relevant tasks, such as segmenting the phenotypic traits  
256 of species. Finally, we also plan to exploit other forms of hierarchical information such as phylogenetic tree-based distances among  
257 species to better understand how this informs biologically-informed neural network feature learning.

258 Recent advances in image computation are enabling automated methods of extracting phenotypic data from specimen images.  
259 We hope that our present framework for leveraging biological information in training machine learning models will have a direct

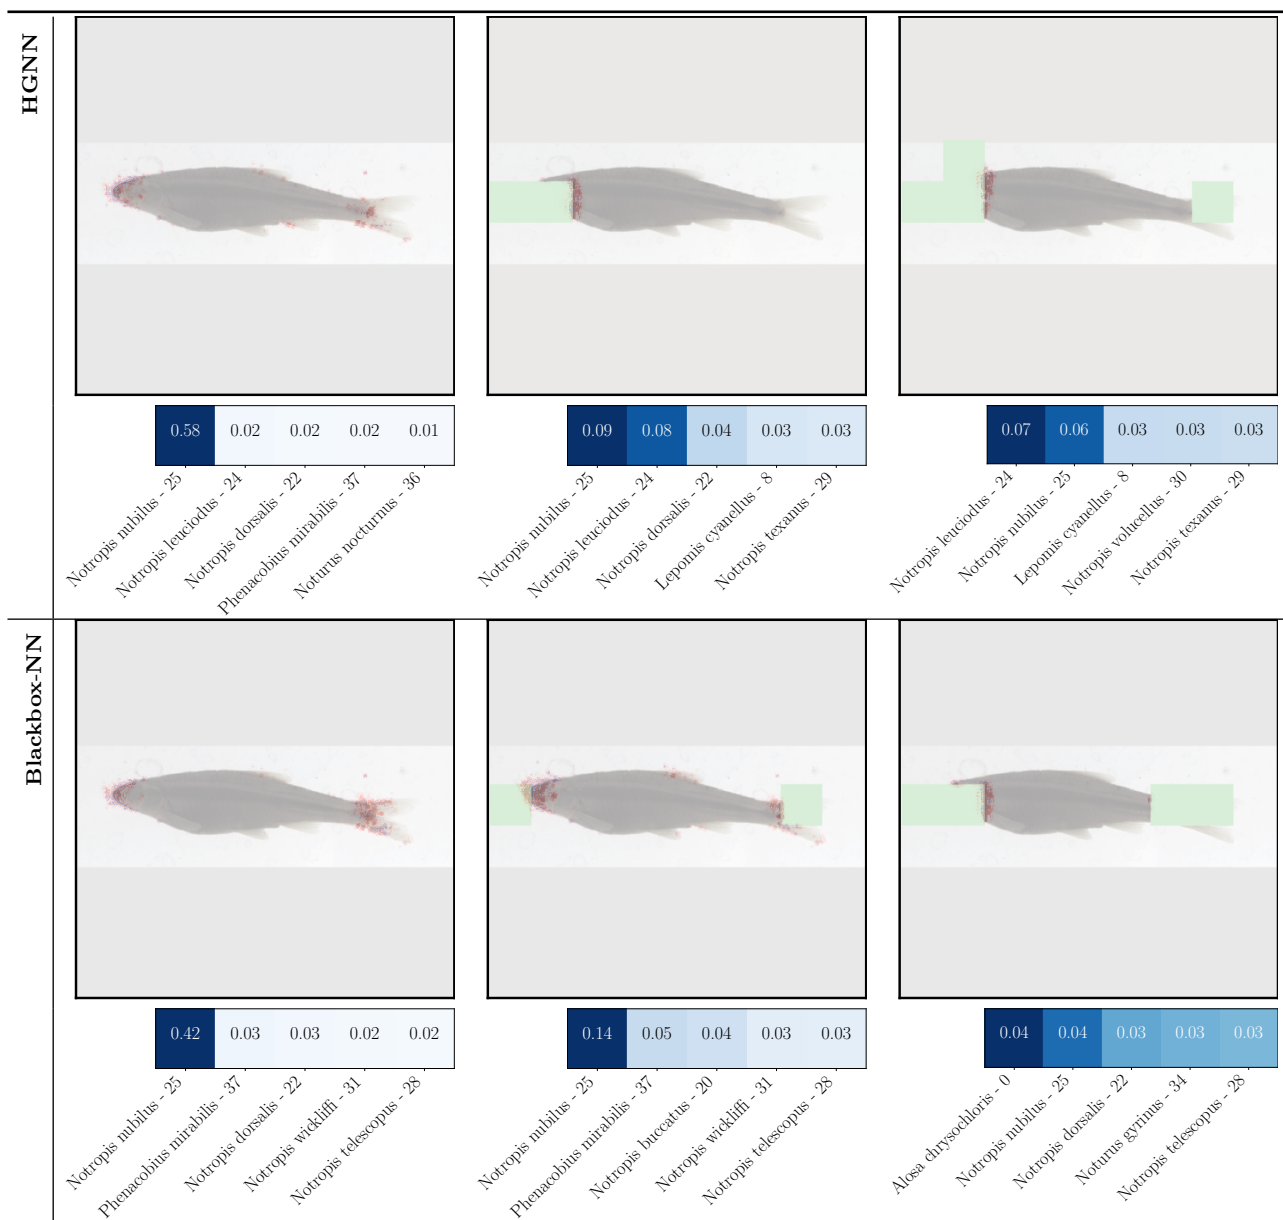

Fig. 7: Saliency maps showing the effect of adversarial occlusions (shown as green square patches) on the predicted probabilities of the species class produced by **HGNN** (top row) and **Blackbox-NN** (bottom row) on an example fish image. The left-most column corresponds to the case with no occlusion, while the number of occlusions increase as we go from left column to the middle column (2 patches) to the right-most column (4 patches).

260 impact on several biologically relevant computer vision tasks, including species detection (Li et al., 2016), tracking and counting  
 261 (Spampinato et al., 2008), segmentation (Chuang et al., 2013; Yao et al., 2013), and classification (Ding et al., 2017; Rathi et al.,  
 262 2018; Sarigul, 2017). This automation effort is essential as manual annotation is laborious and requires expertise (Villon et al.,  
 263 2020), especially with the large amount of data that has become recently available (Ditria et al., 2020a). Moreover, it has been  
 264 shown that automation can be more accurate than human annotation (Ditria et al., 2020b).

265 In this paper, we have focused on teleost fishes as a model system for species classification due to their high diversity and  
 266 importance economically and scientifically. Fishes are the targets of recreation (Arlinghaus and Cooke, 2009), aquaculture and  
 267 fisheries (Lynch et al., 2016), and conservation (Arthington et al., 2016). Fishes make up more than half of all vertebrates and they

268 play critical roles in Earth ecosystems (Near et al., 2012; Villon et al., 2020). However, our framework of **HGNN** is quite generic  
269 and can be potentially applied to incorporate hierarchical knowledge into machine learning models for a broad variety of other  
270 biological problems involving phenotypic trait discovery and understanding in other taxonomic groups.

## 271 Data Availability

272 For this work, and in an effort to create a diverse and statistically substantial dataset, we aggregated more than 60,000 images of  
273 fish specimens from five ichthyological research collections (Field Museum of Natural History <http://www.tubri.org/HDR/FMNH/>,  
274 Illinois Natural History Survey <http://www.tubri.org/HDR/INHS/>, J. F. Bell Museum of Natural History (<http://www.tubri.org/HDR/JFBM/>), Ohio State University Museum of Biological Diversity (<http://www.tubri.org/HDR/OSUM/>), and the University of  
275 Wisconsin-Madison Zoological Museum (<http://www.tubri.org/HDR/UWZM/>)) that participated in the Great Lakes Invasives Network  
276 Project (GLIN) <sup>1</sup>. The GLIN project is digitizing 1.73 million historical biological specimens representing 2,550 species, including  
277 fishes, clams, snails, mussels, algae and plants that are potentially invasive to the Great Lakes Region of the U.S. The computer  
278 code used for running our experiments is found at <https://github.com/elhamod/HGNN>.

## 280 Acknowledgment

281 This work is supported by the National Science Foundation through Harnessing the Data Revolution Ideas Lab program awards  
282 1940322 (Bart); 1940233 (Greenberg); 2022042 (Mabee); 1940247 (Karpatne) and 1939505 (Maga), and also a startup allocation  
283 from the XSEDE (TG-DEB200005).

## 284 Authors' contribution

285 M.E designed the methodology from machine learning perspective and conducted and analysed the experiments. K.D, A.M.M and  
286 B.A pre-processed the data and helped design the experiments from phylogeny perspective. Y.B collected and labelled the data.  
287 H.B, P.M and W.D critiqued the methodology and provided suggestions to improve it. They also helped in selecting the set of  
288 species to work on and the general direction of research to explore. J.L and J.G helped setting up the pipeline for managing image  
289 metadata and creating workflows for model deployment. A.K provided overall supervision across all tasks conducted in this work.  
290 All authors contributed to writing the manuscript and gave final approval for publication.

## 291 Ethics

292 All images were collected from museum repositories and we did not use any live animals in this study. Authors declare no conflicts  
293 of interests.

## 294 References

295 Vaneeda Allken, Nils Olav Handegard, Shale Rosen, Tiffanie Schreyeck, Thomas Mahiout, and Ketil Malde. Fish species identification using  
296 a convolutional neural network trained on synthetic data. *ICES Journal of Marine Science*, 76(1):342–349, jan 2019. ISSN 1054-3139.  
297 doi: 10.1093/icesjms/fsy147.

---

<sup>1</sup> <http://greatlakesinvasives.org/>

- 298 Robert Arlinghaus and Steven J. Cooke. Recreational Fisheries: Socioeconomic Importance, Conservation Issues and Management Challenges.  
299 *Recreational Hunting, Conservation and Rural Livelihoods: Science and Practice*, pages 39–58, 2009. doi: 10.1002/9781444303179.ch3.
- 300 Angela H. Arthington, Nicholas K. Dulvy, William Gladstone, and Ian J. Winfield. Fish conservation in freshwater and marine realms:  
301 status, threats and management. *Aquatic Conservation: Marine and Freshwater Ecosystems*, 26(5):838–857, 2016. ISSN 10990755. doi:  
302 10.1002/aqc.2712.
- 303 Brian B Avants. *ANTsR: ANTs in R: Quantification Tools for Biomedical Images*, 2019. R package version 0.5.4.2.
- 304 Ricardo Betancur-R, Edward O Wiley, Gloria Arratia, Arturo Acero, Nicolas Bailly, Masaki Miya, Guillaume Lecointre, and Guillermo Orti.  
305 Phylogenetic classification of bony fishes. *BMC evolutionary biology*, 17(1):162, 2017.
- 306 M. Chuang, J. Hwang, and C. S. Rose. Aggregated segmentation of fish from conveyor belt videos. In *2013 IEEE International Conference*  
307 *on Acoustics, Speech and Signal Processing*, pages 1807–1811, 2013.
- 308 C. Costa, F. Antonucci, C. Boglione, P. Menesatti, M. Vandeputte, and B. Chatain. Automated sorting for size, sex and skeletal anomalies  
309 of cultured seabass using external shape analysis. *Aquacultural Engineering*, 52:58–64, jan 2013. ISSN 01448609. doi: 10.1016/j.aquaeng.  
310 2012.09.001.
- 311 J. Deng, W. Dong, R. Socher, L.-J. Li, K. Li, and L. Fei-Fei. ImageNet: A Large-Scale Hierarchical Image Database. In *CVPR09*, 2009.
- 312 G. Ding, Y. Song, J. Guo, C. Feng, G. Li, B. He, and T. Yan. Fish recognition using convolutional neural network. In *OCEANS 2017 -*  
313 *Anchorage*, pages 1–4, 2017.
- 314 Ellen Ditria, Michael Sievers, Sebastian Lopez-Marcano, Eric L. Jinks, and Rod M. Connolly. Deep learning for automated analysis  
315 of fish abundance: the benefits of training across multiple habitats. *bioRxiv*, 2020a. doi: 10.1101/2020.05.19.105056. URL <https://www.biorxiv.org/content/early/2020/05/22/2020.05.19.105056>.
- 316 [//www.biorxiv.org/content/early/2020/05/22/2020.05.19.105056](https://www.biorxiv.org/content/early/2020/05/22/2020.05.19.105056).
- 317 Ellen M. Ditria, Sebastian Lopez-Marcano, Michael Sievers, Eric L. Jinks, Christopher J. Brown, and Rod M. Connolly. Automating the  
318 analysis of fish abundance using object detection: Optimizing animal ecology with deep learning. *Frontiers in Marine Science*, 7:429,  
319 2020b. ISSN 2296-7745. doi: 10.3389/fmars.2020.00429. URL <https://www.frontiersin.org/article/10.3389/fmars.2020.00429>.
- 320 Anderson Aparecido dos Santos and Wesley Nunes Gonçalves. Improving pantanal fish species recognition through taxonomic ranks in  
321 convolutional neural networks. *Ecological Informatics*, 53:100977, 2019. ISSN 1574-9541. doi: [https://doi.org/10.1016/j.ecoinf.2019.](https://doi.org/10.1016/j.ecoinf.2019.100977)  
322 100977. URL <https://www.sciencedirect.com/science/article/pii/S1574954119301001>.
- 323 David Glynne Fox and Thomas PV Hartman. Photographing fluid-preserved specimens. In *Biobanking*, pages 149–153. Springer, 2019.
- 324 Ross Girshick, Jeff Donahue, Trevor Darrell, and Jitendra Malik. Rich feature hierarchies for accurate object detection and semantic  
325 segmentation. In *2014 IEEE Conference on Computer Vision and Pattern Recognition*, pages 580–587, 2014. doi: 10.1109/CVPR.2014.  
326 81.
- 327 Ian Goodfellow, Yoshua Bengio, Aaron Courville, and Yoshua Bengio. *Deep learning*, volume 1. MIT press Cambridge, 2016.
- 328 Snigdhaa Hasija, Manas Jyoti Buragohain, and S. Indu. Fish species classification using graph embedding discriminant analysis. In  
329 *Proceedings - 2017 International Conference on Machine Vision and Information Technology, CMVIT 2017*, pages 81–86. Institute of  
330 Electrical and Electronics Engineers Inc., mar 2017. ISBN 9781509049936. doi: 10.1109/CMVIT.2017.23.
- 331 Kaiming He, Xiangyu Zhang, Shaoqing Ren, and Jian Sun. Deep residual learning for image recognition. *2016 IEEE Conference on*  
332 *Computer Vision and Pattern Recognition (CVPR)*, pages 770–778, 2016.
- 333 Gene Helfman, Bruce B Collette, Douglas E Facey, and Brian W Bowen. *The diversity of fishes: biology, evolution, and ecology*. John  
334 Wiley & Sons, 2009.
- 335 Willi Hennig. *Phylogenetic systematics*. 1966.
- 336 Gao Huang, Zhuang Liu, Laurens Van Der Maaten, and Kilian Q Weinberger. Densely connected convolutional networks. In *Proceedings of*  
337 *the IEEE conference on computer vision and pattern recognition*, pages 4700–4708, 2017.

- 338 Lily C Hughes, Guillermo Ortí, Yu Huang, Ying Sun, Carole C Baldwin, Andrew W Thompson, Dahiana Arcila, Ricardo Betancur-R,  
339 Chenhong Li, Leandro Becker, et al. Comprehensive phylogeny of ray-finned fishes (actinopterygii) based on transcriptomic and genomic  
340 data. *Proceedings of the National Academy of Sciences*, 115(24):6249–6254, 2018.
- 341 Ahsan Jalal, Ahmad Salman, Ajmal Mian, Mark Shortis, and Faisal Shafait. Fish detection and species classification in underwater  
342 environments using deep learning with temporal information. *Ecological Informatics*, 57:101088, 2020. ISSN 1574-9541. doi: <https://doi.org/10.1016/j.ecoinf.2020.101088>. URL <https://www.sciencedirect.com/science/article/pii/S1574954120300388>.
- 343  
344 Xiaowei Jia, Jared Willard, Anuj Karpatne, Jordan Read, Jacob Zwart, Michael Steinbach, and Vipin Kumar. *Physics Guided RNNs for*  
345 *Modeling Dynamical Systems: A Case Study in Simulating Lake Temperature Profiles*, pages 558–566. 05 2019. ISBN 978-1-61197-567-3.  
346 doi: 10.1137/1.9781611975673.63.
- 347 Anuj Karpatne, Gowtham Atluri, James H Faghmous, Michael Steinbach, Arindam Banerjee, Auroop Ganguly, Shashi Shekhar, Nagiza  
348 Samatova, and Vipin Kumar. Theory-guided data science: A new paradigm for scientific discovery from data. *IEEE Transactions on*  
349 *Knowledge and Data Engineering*, 29(10):2318–2331, 2017.
- 350 Asifullah Khan, Anabia Sohail, Umme Zahoor, and Aqsa Saeed Qureshi. A survey of the recent architectures of deep convolutional  
351 neural networks. *Artificial Intelligence Review*, 53(8):5455–5516, Apr 2020. ISSN 1573-7462. doi: 10.1007/s10462-020-09825-6. URL  
352 <http://dx.doi.org/10.1007/s10462-020-09825-6>.
- 353 Ron Kikinis, Steve D. Pieper, and Kirby G. Vosburgh. 3D Slicer: A Platform for Subject-Specific Image Analysis, Visualization, and Clinical  
354 Support. In *Intraoperative Imaging and Image-Guided Therapy*, pages 277–289. Springer, New York, NY, 2014. ISBN 978-1-4614-7656-6  
355 978-1-4614-7657-3. doi: 10.1007/978-1-4614-7657-3\_19. URL [https://link.springer.com/chapter/10.1007/978-1-4614-7657-3\\_19](https://link.springer.com/chapter/10.1007/978-1-4614-7657-3_19).
- 356 Alex Krizhevsky. Learning multiple layers of features from tiny images. Technical report, 2009.
- 357 Alex Krizhevsky, Ilya Sutskever, and Geoffrey E Hinton. Imagenet classification with deep convolutional neural  
358 networks. In F. Pereira, C. J. C. Burges, L. Bottou, and K. Q. Weinberger, editors, *Advances in Neural*  
359 *Information Processing Systems 25*, pages 1097–1105. Curran Associates, Inc., 2012. URL [http://papers.nips.cc/paper/](http://papers.nips.cc/paper/4824-imagenet-classification-with-deep-convolutional-neural-networks.pdf)  
360 [4824-imagenet-classification-with-deep-convolutional-neural-networks.pdf](http://papers.nips.cc/paper/4824-imagenet-classification-with-deep-convolutional-neural-networks.pdf).
- 361 Yakup Kutlu, Bilal Iscimen, and Cemal Turan. Multi-stage fish classification system using morphometry. *Fresenius Environmental Bulletin*,  
362 26:1910–1916, 03 2017.
- 363 Rasmus Larsen, Hildur Olafsdottir, and Bjarne Kjær Ersbøll. Shape and texture based classification of fish species. In *Lecture Notes in*  
364 *Computer Science (including subseries Lecture Notes in Artificial Intelligence and Lecture Notes in Bioinformatics)*, volume 5575  
365 LNCS, pages 745–749. Springer, Berlin, Heidelberg, 2009. ISBN 3642022294. doi: 10.1007/978-3-642-02230-2\_76.
- 366 D. J. Lee, Sharon Redd, Robert Schoenberger, Xiaoqian Xu, and Pengcheng Zhan. An Automated Fish Species Classification and Migration  
367 Monitoring System. In *IECON Proceedings (Industrial Electronics Conference)*, volume 2, pages 1080–1085, 2003. doi: 10.1109/IECON.  
368 2003.1280195.
- 369 Dah Jye Lee, James K. Archibald, Robert B. Schoenberger, Aaron W. Dennis, and Dennis K. Shiozawa. Contour matching for fish species  
370 recognition and migration monitoring. *Studies in Computational Intelligence*, 122:183–207, 2008. ISSN 1860949X. doi: 10.1007/  
371 978-3-540-78534-7\_8.
- 372 Xiu Li, Min Shang, Hongwei Qin, and Liansheng Chen. Fast accurate fish detection and recognition of underwater images with Fast R-CNN.  
373 In *OCEANS 2015 - MTS/IEEE Washington*. Institute of Electrical and Electronics Engineers Inc., feb 2016. ISBN 9780933957435. doi:  
374 10.23919/oceans.2015.7404464.
- 375 Abigail J. Lynch, Steven J. Cooke, Andrew M. Deines, Shannon D. Bower, David B. Bunnell, Ian G. Cowx, Vivian M. Nguyen, Joel Nohner,  
376 Kaviphone Phouthavong, Betsy Riley, Mark W. Rogers, William W. Taylor, Whitney Woelmer, So Jung Youn, and T. Douglas Beard.  
377 The social, economic, and environmental importance of inland fish and fisheries. *Environmental Reviews*, 24(2):115–121, 2016. ISSN

378 11818700. doi: 10.1139/er-2015-0064.

379 Robert McGill, John W Tukey, and Wayne A Larsen. Variations of box plots. *The American Statistician*, 32(1):12–16, 1978.

380 Keerthiram Murugesan, Hanxiao Liu, Jaime Carbonell, and Yiming Yang. Adaptive smoothed online multi-task learning.  
381 In D. Lee, M. Sugiyama, U. Luxburg, I. Guyon, and R. Garnett, editors, *Advances in Neural Information Processing*  
382 *Systems*, volume 29, pages 4296–4304. Curran Associates, Inc., 2016. URL <https://proceedings.neurips.cc/paper/2016/file/a869ccbcdb9568808b8497e28275c7c8-Paper.pdf>.

384 Thomas J. Near, Ron I. Eytan, Alex Dornburg, Kristen L. Kuhn, Jon A. Moore, Matthew P. Davis, Peter C. Wainwright, Matt Friedman,  
385 and W. Leo Smith. Resolution of ray-finned fish phylogeny and timing of diversification. *Proceedings of the National Academy of Sciences*  
386 *of the United States of America*, 109(34):13698–13703, 2012. ISSN 00278424. doi: 10.1073/pnas.1206625109.

387 S O Ogunlana, O Olabode, S A A Oluwadare, and G B Iwasokun. Fish Classification Using Support Vector Machine. Technical Report 2,  
388 2015. URL [www.ajocict.net](http://www.ajocict.net).

389 Misa Ogura and Ravi Jain. Flashtorch. <http://doi.org/10.5281/zenodo.3596650>, 2020.

390 Nobuyuki Otsu. A threshold selection method from gray-level histograms. *IEEE transactions on systems, man, and cybernetics*, 9(1):  
391 62–66, 1979.

392 Dhruv Rathi, Sushant Jain, and S. Indu. Underwater Fish Species Classification using Convolutional Neural Network and Deep Learning.  
393 In *2017 9th International Conference on Advances in Pattern Recognition, ICAPR 2017*, pages 344–349. Institute of Electrical and  
394 Electronics Engineers Inc., dec 2018. ISBN 9781538622414. doi: 10.1109/ICAPR.2017.8593044.

395 Hafiz Tayyab Rauf, Muhammad Ikram Lali, Saliha Zahoor, Syed Zakir Shah, Abd Rehman, and Syed Ahmad Chan Bukhari. Visual features  
396 based automated identification of fish species using deep convolutional neural networks. *Computers and Electronics in Agriculture*, 11  
397 2019. doi: 10.1016/j.compag.2019.105075.

398 Joseph Redmon, Santosh Divvala, Ross Girshick, and Ali Farhadi. You only look once: Unified, real-time object detection. In *2016 IEEE*  
399 *Conference on Computer Vision and Pattern Recognition (CVPR)*, pages 779–788, 2016. doi: 10.1109/CVPR.2016.91.

400 Marco T.A. Rodrigues, Flávio L.C. Pádua, Rogério M. Gomes, and Gabriela E. Soares. Automatic fish species classification based on robust  
401 feature extraction techniques and artificial immune systems. In *Proceedings 2010 IEEE 5th International Conference on Bio-Inspired*  
402 *Computing: Theories and Applications, BIC-TA 2010*, pages 1518–1525, 2010. ISBN 9781424464388. doi: 10.1109/BICTA.2010.5645273.

403 Ahmad Salman, Shoaib Ahmad Siddiqui, Faisal Shafait, Ajmal Mian, Mark R Shortis, Khawar Khurshid, Adrian Ulges, and Ulrich  
404 Schwanecke. Automatic fish detection in underwater videos by a deep neural network-based hybrid motion learning system. *ICES*  
405 *Journal of Marine Science*, 77(4):1295–1307, 02 2019. ISSN 1054-3139. doi: 10.1093/icesjms/fsz025. URL [https://doi.org/10.1093/](https://doi.org/10.1093/icesjms/fsz025)  
406 [icesjms/fsz025](https://doi.org/10.1093/icesjms/fsz025).

407 Mehmet Sarigul. Comparison of different deep structures for fish classification. *International Journal of Computer Theory and Engineering*,  
408 9, 10 2017. doi: 10.7763/IJCTE.2017.V9.1167.

409 Ramprasaath R. Selvaraju, Michael Cogswell, Abhishek Das, Ramakrishna Vedantam, Devi Parikh, and Dhruv Batra. Grad-cam: Visual  
410 explanations from deep networks via gradient-based localization. In *2017 IEEE International Conference on Computer Vision (ICCV)*,  
411 pages 618–626, 2017. doi: 10.1109/ICCV.2017.74.

412 Connor Shorten and Taghi M Khoshgoftaar. A survey on image data augmentation for deep learning. *Journal of Big Data*, 6(1):60, 2019.

413 Shoaib Ahmed Siddiqui, Ahmad Salman, Muhammad Imran Malik, Faisal Shafait, Ajmal Mian, Mark R Shortis, and Euan S Harvey.  
414 Automatic fish species classification in underwater videos: exploiting pre-trained deep neural network models to compensate for limited  
415 labelled data. *ICES Journal of Marine Science*, 75(1):374–389, jan 2018. ISSN 1054-3139. doi: 10.1093/icesjms/fsx109.

416 Carlos N Silla and Alex A Freitas. A survey of hierarchical classification across different application domains. *Data Mining and Knowledge*  
417 *Discovery*, 22(1-2):31–72, 2011.

- 418 Karen Simonyan and Andrew Zisserman. Very deep convolutional networks for large-scale image recognition. *arXiv preprint*  
419 *arXiv:1409.1556*, 2014.
- 420 Karen Simonyan, Andrea Vedaldi, and Andrew Zisserman. Deep inside convolutional networks: Visualising image classification models and  
421 saliency maps. *CoRR*, abs/1312.6034, 2014.
- 422 C. Spampinato, Y.-H. Chen-Burger, G. Nadarajan, and R. Fisher. Detecting, tracking and counting fish in low quality unconstrained  
423 underwater videos. In *Proc. 3rd Int. Conf. on Computer Vision Theory and Applications (VISAPP)*, volume 2, pages 514–519, 2008.  
424 ISBN 978-989-8111-21-0.
- 425 Jost Tobias Springenberg, Alexey Dosovitskiy, Thomas Brox, and Martin A. Riedmiller. Striving for simplicity: The all convolutional net.  
426 In Yoshua Bengio and Yann LeCun, editors, *3rd International Conference on Learning Representations, ICLR 2015, San Diego, CA,*  
427 *USA, May 7-9, 2015, Workshop Track Proceedings*, 2015. URL <http://arxiv.org/abs/1412.6806>.
- 428 C. Szegedy, Wei Liu, Yangqing Jia, P. Sermanet, S. Reed, D. Anguelov, D. Erhan, V. Vanhoucke, and A. Rabinovich. Going deeper with  
429 convolutions. In *2015 IEEE Conference on Computer Vision and Pattern Recognition (CVPR)*, pages 1–9, 2015.
- 430 Chuanqi Tan, Fuchun Sun, Tao Kong, Wenchang Zhang, Chao Yang, and Chunfang Liu. A survey on deep transfer learning. In *International*  
431 *conference on artificial neural networks*, pages 270–279. Springer, 2018a.
- 432 P.N. Tan, M. Steinbach, A. Karpatne, and V. Kumar. *Introduction to data mining (2nd edition)*. Pearson Addison Wesley Boston, 2018b.
- 433 Nicholas J. Tustison, Zixuan Lin, Xue Feng, Nicholas Cullen, Jaime F. Mata, Lucia Flors, James C. Gee, Talissa A. Altes, John P. Mugler III,  
434 and Kun Qing. Convolutional neural networks with template-based data augmentation for functional lung image quantification. *Academic*  
435 *Radiology*, 2018. URL <https://www.ncbi.nlm.nih.gov/pubmed/30195415>.
- 436 Sebastien Villon, David Mouillot, Marc Chaumont, Gérard Subsol, Thomas Claverie, and Sébastien Villéger. A new method to control  
437 error rates in automated species identification with deep learning algorithms. *Scientific Reports*, 10:10972, 07 2020. doi: 10.1038/  
438 s41598-020-67573-7.
- 439 Sébastien Villon, Corina Iovan, Morgan Mangeas, Thomas Claverie, David Mouillot, Sébastien Villéger, and Laurent Vigliola. Automatic  
440 underwater fish species classification with limited data using few-shot learning. *Ecological Informatics*, 63:101320, 2021. ISSN 1574-9541.  
441 doi: <https://doi.org/10.1016/j.ecoinf.2021.101320>. URL <https://www.sciencedirect.com/science/article/pii/S1574954121001114>.
- 442 Yaqing Wang, Quanming Yao, James Kwok, and Lionel M. Ni. Generalizing from a few examples: A survey on few-shot learning, 2020.
- 443 Saining Xie, Ross Girshick, Piotr Dollár, Zhuowen Tu, and Kaiming He. Aggregated residual transformations for deep neural networks. In  
444 *Proceedings of the IEEE conference on computer vision and pattern recognition*, pages 1492–1500, 2017.
- 445 Hong Yao, Qingling Duan, Daoliang Li, and Jianping Wang. An improved K-means clustering algorithm for fish image segmentation.  
446 *Mathematical and Computer Modelling*, 58(3-4):790–798, 2013. ISSN 08957177. doi: 10.1016/j.mcm.2012.12.025.
- 447 Jason Yosinski, Jeff Clune, Yoshua Bengio, and Hod Lipson. How transferable are features in deep neural networks? In *Proceedings of*  
448 *the 27th International Conference on Neural Information Processing Systems - Volume 2, NIPS'14*, page 3320–3328, Cambridge, MA,  
449 USA, 2014. MIT Press.
- 450 Min-Ling Zhang and Zhi-Hua Zhou. A review on multi-label learning algorithms. *IEEE transactions on knowledge and data engineering*,  
451 26(8):1819–1837, 2013.



**Table 1.** Statistics of the subsets of the GLIN dataset used in this study for training and evaluation.

| Dataset         | # of images | # of species | # of genera | # of images per species |
|-----------------|-------------|--------------|-------------|-------------------------|
| GLIN (All)      | 63758       | 575          | 187         | 1 to 7935               |
| <b>Hard</b>     | 4882        | 102          | 26          | 30 to 50                |
| <b>Easy/100</b> | 3762        | 38           | 11          | 63 to 100               |
| <b>Easy/50</b>  | 1900        | 38           | 11          | 50                      |

**Table 2.** Average probability of the correct species class predicted by **Blackbox-NN** and **HGNN** over **Easy/50**, as a function of the number of adversarial occlusions applied to every image. From left to right, we start with non-occluded images and progressively add more patches of occlusions.

| Model              | Number of Occlusion Patches |       |       |       |       |
|--------------------|-----------------------------|-------|-------|-------|-------|
|                    | 0                           | 1     | 2     | 3     | 4     |
| <b>Blackbox-NN</b> | 0.473                       | 0.355 | 0.291 | 0.232 | 0.187 |
| <b>HGNN</b>        | 0.482                       | 0.369 | 0.307 | 0.256 | 0.215 |
